# Supplementary material
Source: publisher figshare collection journal article supplement (https://acs.figshare.com/ndownloader/files/5673186)
Supplement: Supplementary file 1 [file 5673186]

# BIOCHEMISTRY

including biophysical chemistry & molecular biology

Biochemistry, 1996, 35(16), 5308-5317, DOI: [10.1021/bi952994p](https://doi.org/10.1021/bi952994p)

## Terms & Conditions

Electronic Supporting Information files are available without a subscription to ACS Web Editions. The American Chemical Society holds a copyright ownership interest in any copyrightable Supporting Information. Files available from the ACS website may be downloaded for personal use only. Users are not otherwise permitted to reproduce, republish, redistribute, or sell any Supporting Information from the ACS website, either in whole or in part, in either machine-readable form or any other form without permission from the American Chemical Society. For permission to reproduce, republish and redistribute this material, requesters must process their own requests via the RightsLink permission system. Information about how to use the RightsLink permission system can be found at <http://pubs.acs.org/page/copyright/permissions.html>

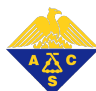

ACS Publications

MOST TRUSTED. MOST CITED. MOST READ.

Copyright © 1996 American Chemical Society

R-5317-M1

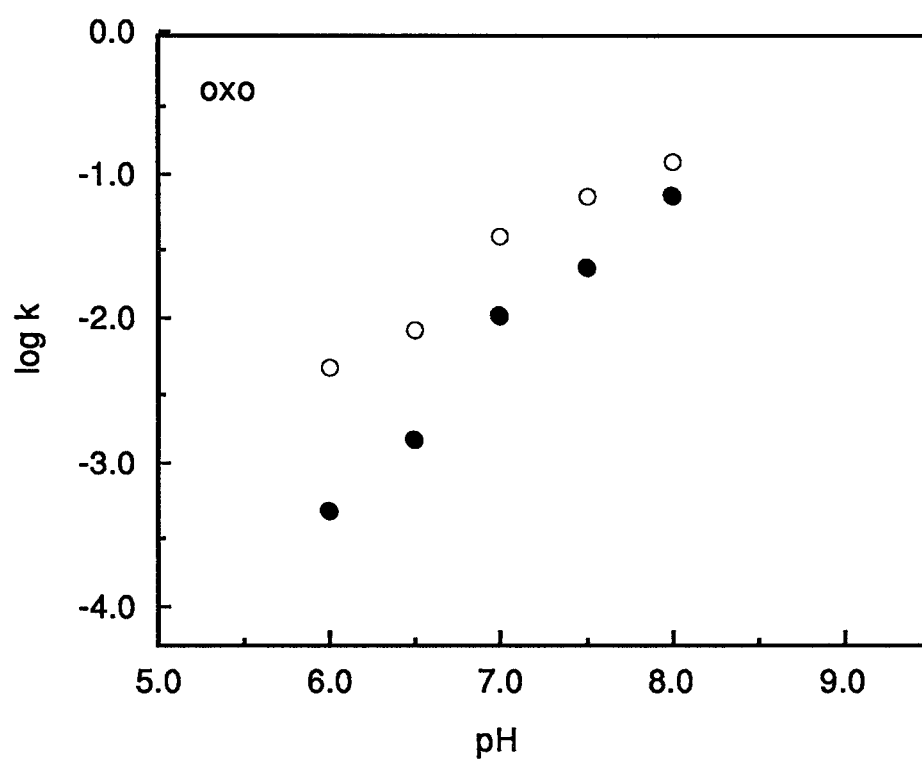

**Figure S1:** Hammerhead ribozyme-mediated cleavage rates for the oxo analogue **1** as a function of pH in the presence of (●) Mg<sup>2+</sup> or (○) Mn<sup>2+</sup>.

K-5317m2

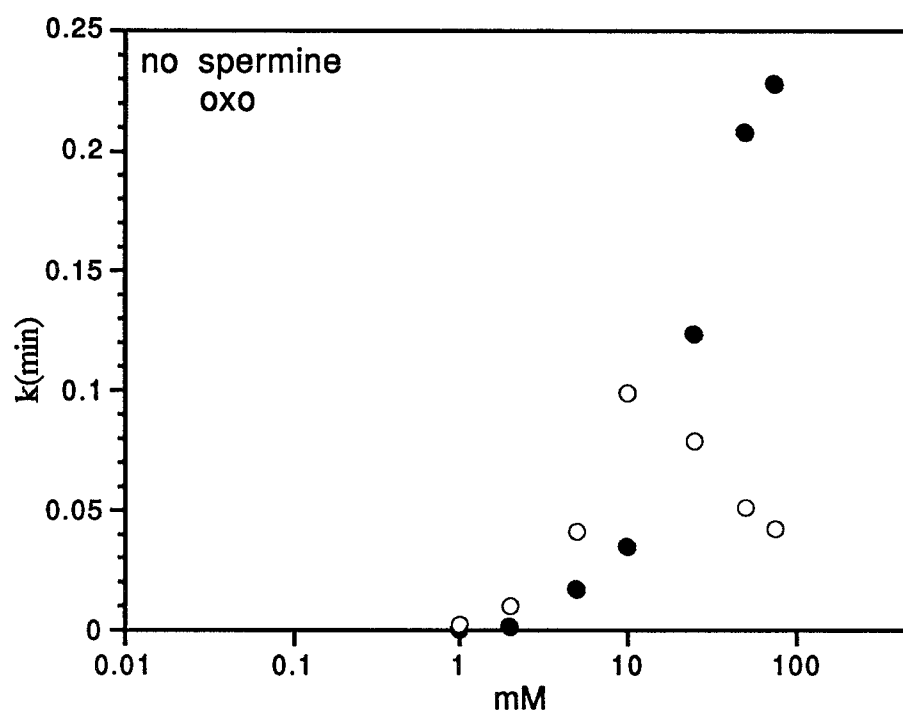

**Figure S2:** Hammerhead ribozyme-mediated cleavage rates of the oxo analogue **1** as a function of divalent metal concentration: (●)  $Mg^{2+}$ , (○)  $Mn^{2+}$ .

k-5317-m3

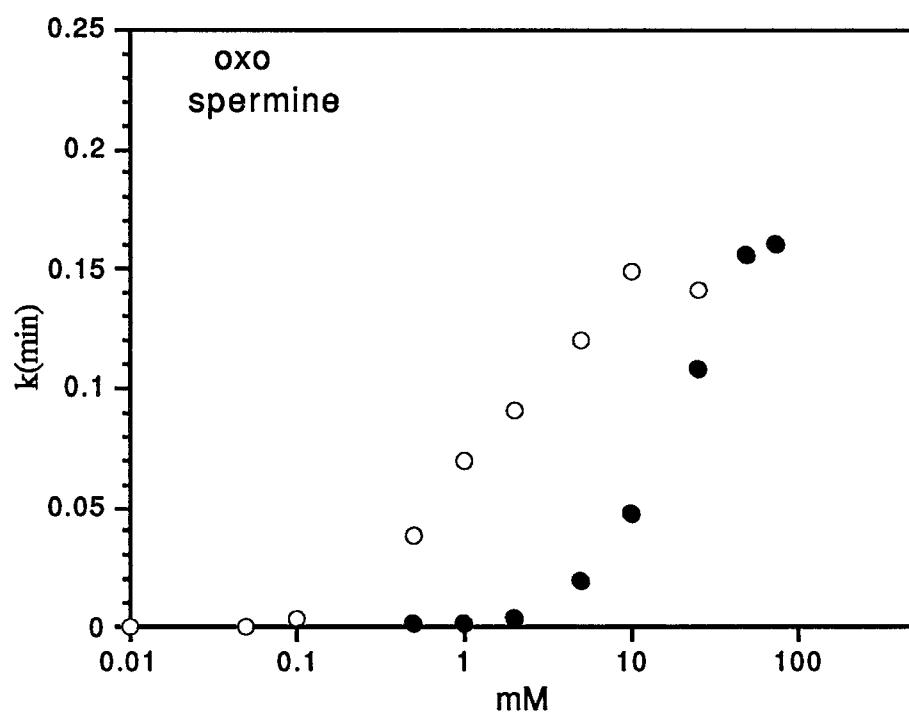

**Figure S3:** Hammerhead ribozyme-mediated cleavage rates of the oxo analogue **1** in the presence of 0.5 mM spermine as a function of divalent metal concentration: (●)  $Mg^{2+}$ , (○)  $Mn^{2+}$ .

K-5317: mL

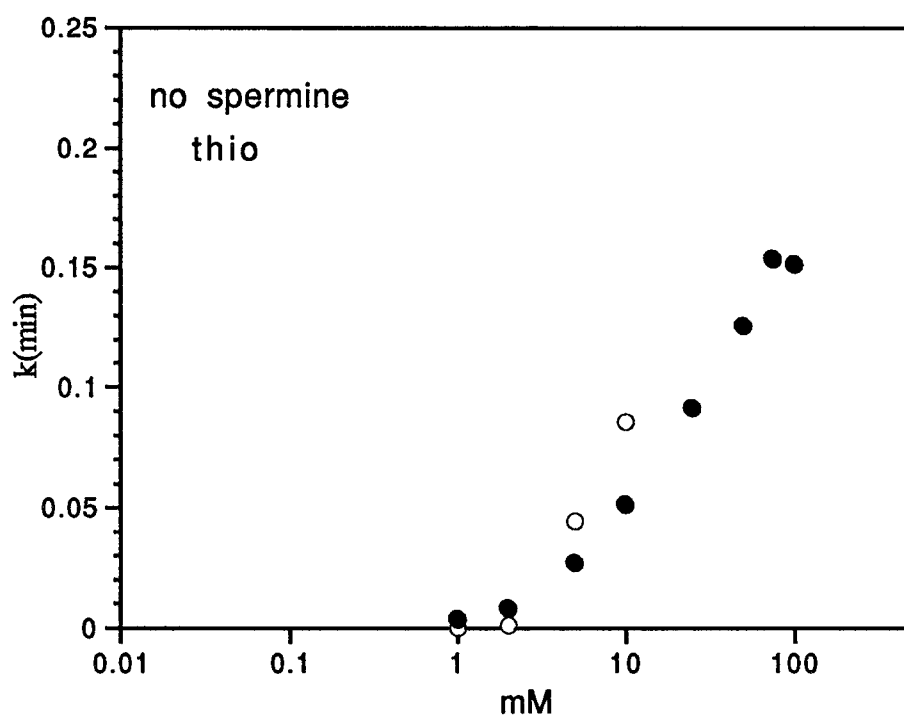

**Figure S4:** Hammerhead ribozyme-mediated cleavage rates of the thio analogue **2** as a function of divalent metal concentration: (●)  $\text{Mg}^{2+}$ , (○)  $\text{Mn}^{2+}$ .

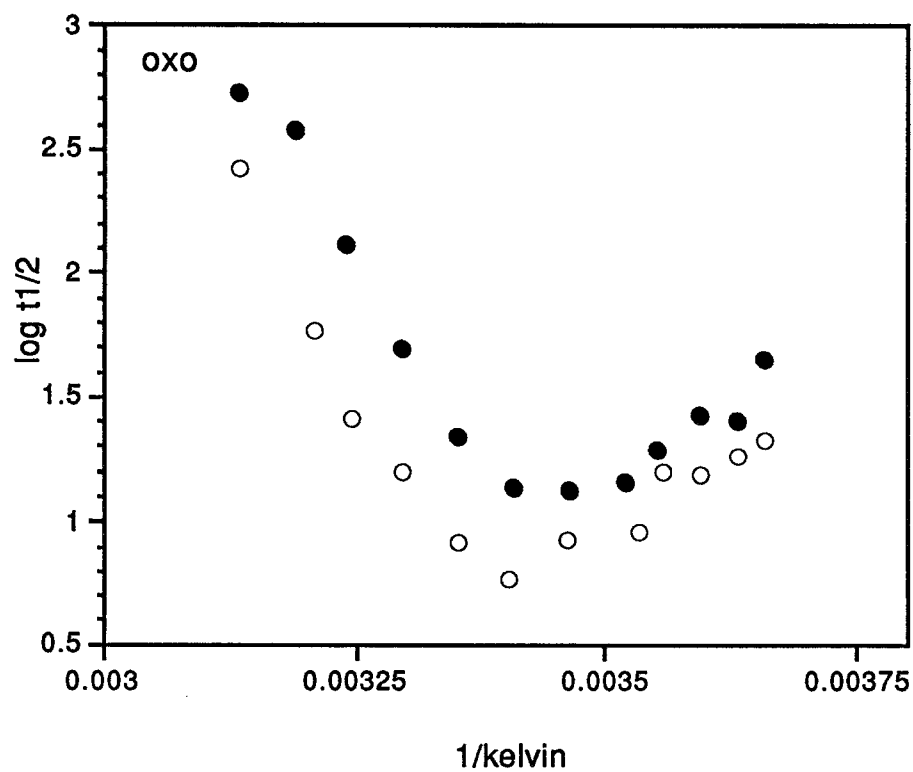

**Figure S5:** Hammerhead ribozyme-mediated cleavage rates of the oxo analogue **1** as a function of temperature in the presence of (●) Mg<sup>2+</sup>, (○) Mn<sup>2+</sup>.

K-5317-mb

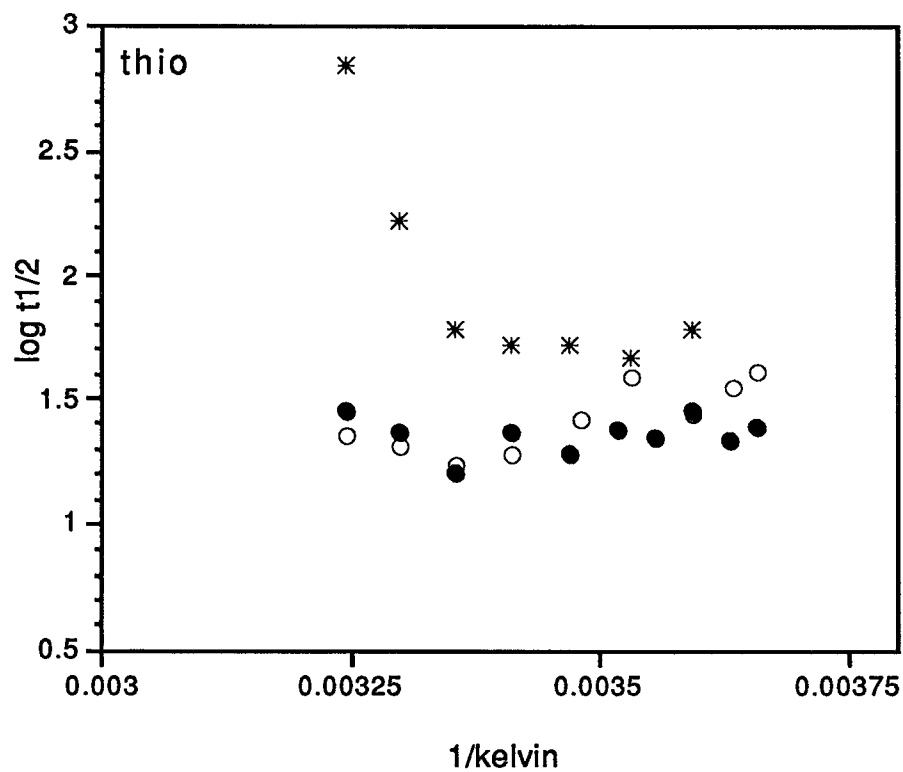

**Figure S6:** Hammerhead ribozyme-mediated cleavage rates of the thio analogue **2** as a function of temperature in the presence of (●) Mg<sup>2+</sup>, (○) Mn<sup>2+</sup> or (\*) EDTA/spermine.
